# Supplementary material
Source: publisher figshare collection journal article supplement (https://springernature.figshare.com/ndownloader/files/22955888)
Supplement: Supplementary file 1 [file 22955888]

### Additional file 3: Figure S2.

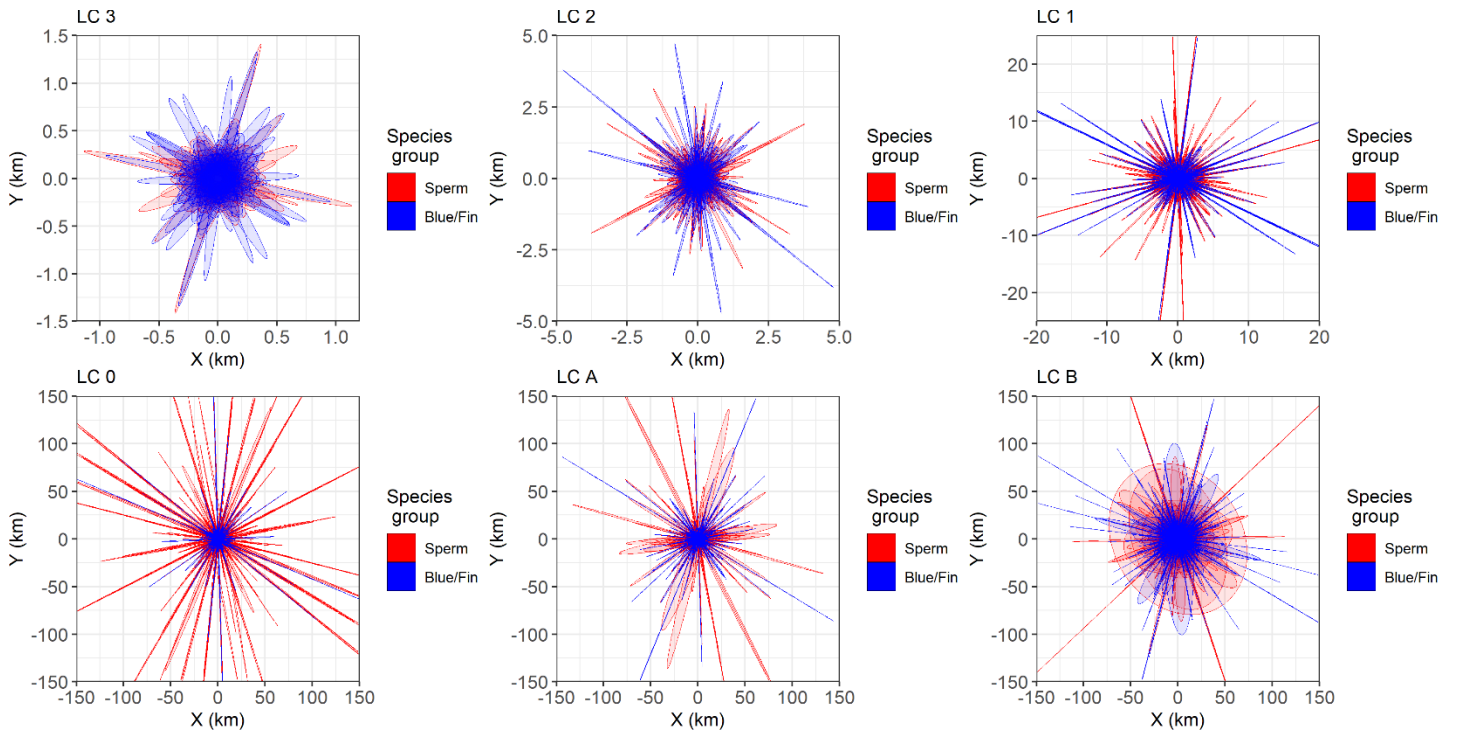

Visualization by location class (LC) of the error ellipses associated with Argos locations, as reported by the Argos Service, that were temporally matched to Fastloc GPS locations for three large whale species (sperm, blue, and fin). Axes are scaled to better visualize the central density of ellipses, resulting in some data extending beyond the axes limits. Data were collected from sperm whales tracked in the Gulf of Mexico during summer 2011 and 2013, and from blue and fin whales tracked off southern California during late summer 2014 and 2015.
